# Supplementary material for: Risk of New-Onset Dementia in Patients with Chronic Kidney Disease on Statin Users: A Population-Based Cohort Study
Source: MDPI journal article supplement (doi:10.3390/biomedicines11041073), 2023-04-02
Supplement: s1 [file s1]

Supplemental Table S1

| Comorbidity                           | ICD-9 CM                     | ICD-10 CM                |
|---------------------------------------|------------------------------|--------------------------|
| Diabetes mellitus                     | 250                          | E08                      |
| Coronary heart disease                | 410-415                      | I21, 25                  |
| Hypertension                          | 401-405                      | I10-I13, I15             |
| Coronary heart disease                | 410-415                      | I21, 25                  |
| Dyslipidemia                          | 272                          | E78                      |
| Chronic obstructive pulmonary disease | 490, 491, 492, 494, 495, 496 | J44                      |
| Ischemic stroke                       | 434                          | I63, I66                 |
| Peptic ulcer                          | 533                          | K27                      |
| Dementia                              | 294                          | F02, F03, F04            |
| Chronic kidney disease                | 585                          | N18                      |
| Heart failure                         | 428, 402.x1, 403.x1          | I50, I10.1, I13.0, I13.2 |
| Peripheral artery disease             | 443.9                        | I73.9                    |
